# Supplementary material for: Deactivation mechanisms of Cu–Zn–Al 2 O 3 in CO 2 hydrogenation induced by SO 2 exposure
Source: Royal Society of Chemistry journal article supplement (doi:10.1039/d5im00025d), 2025-01-01
Supplement: d5im00025d1.pdf [file d5im00025d1.pdf]

## **Supplementary Information for**

### **Deactivation Mechanisms of Cu-Zn-Al<sub>2</sub>O<sub>3</sub> in CO<sub>2</sub> Hydrogenation**

#### **Induced by SO<sub>2</sub> Exposure**

Xuan Bie<sup>a</sup>, Ruoyu Wu<sup>a</sup>, Bocheng Yu<sup>a</sup>, Xuelong Quan<sup>a</sup>, Shiyu Zhang<sup>a</sup>, Qinghai Li<sup>a,b</sup>, Yanguo Zhang<sup>a,b</sup>,  
Hui Zhou<sup>a,b,\*</sup>

\*Corresponding author. Email: [huizhou@tsinghua.edu.cn](mailto:huizhou@tsinghua.edu.cn)

Affiliations <sup>1</sup>Key Laboratory for Thermal Science and Power Engineering of Ministry of Education, Beijing Key Laboratory of CO<sub>2</sub> Utilization and Reduction Technology, Department of Energy and Power Engineering, Tsinghua University, Beijing 100084, P.R. China.

<sup>2</sup>Shanxi Research Institute for Clean Energy, Tsinghua University, Shanxi, Taiyuan 030000, P.R. China.

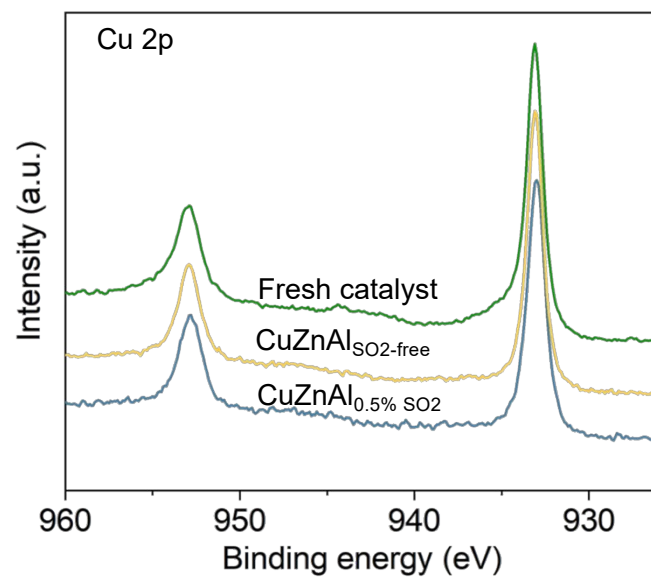

Fig. S1. XPS spectra of Cu 2p of fresh and used Cu-ZnO-Al<sub>2</sub>O<sub>3</sub> catalysts.

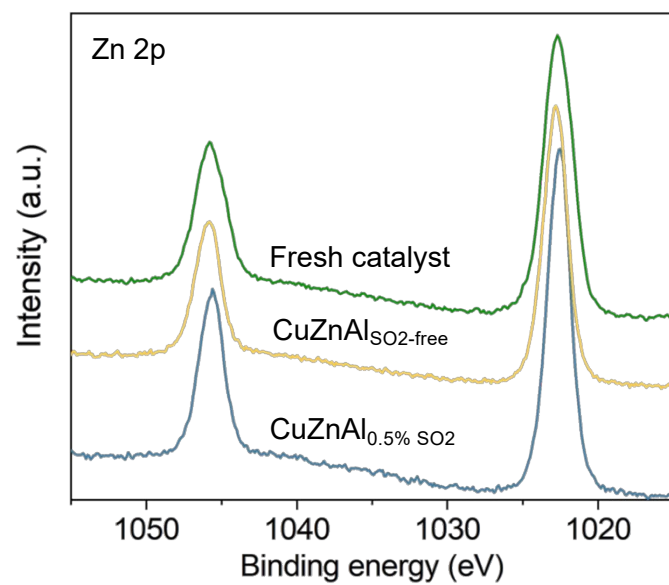

Fig. S2. XPS spectra of Zn 2p of fresh and used Cu-ZnO-Al<sub>2</sub>O<sub>3</sub> catalysts.

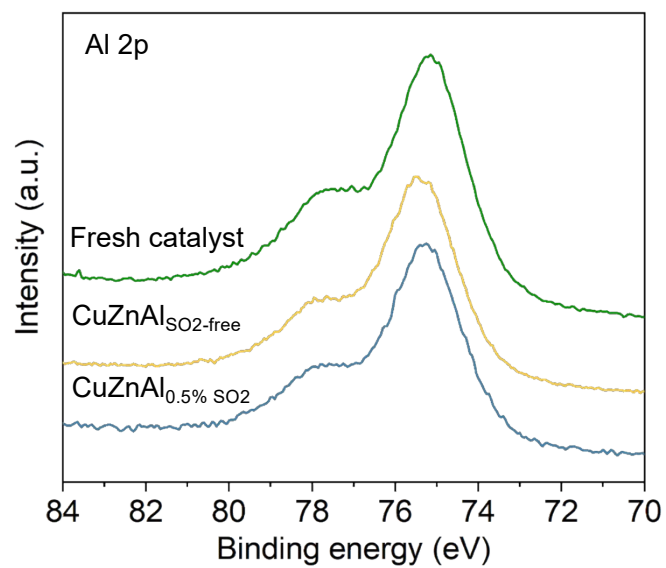

Fig. S3. XPS spectra of Al 2p of fresh and used Cu-ZnO-Al<sub>2</sub>O<sub>3</sub> catalysts.

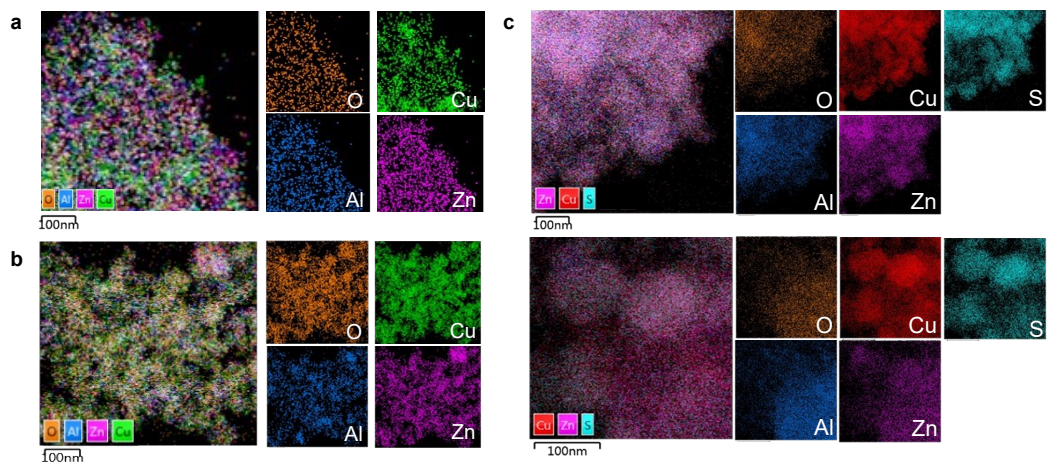

**Fig. S4. STEM analysis and EDX mapping of Cu-ZnO-Al<sub>2</sub>O<sub>3</sub>.**

(a) Fresh catalyst. (b) The used catalyst exposed to H<sub>2</sub>/CO<sub>2</sub>/N<sub>2</sub> (1:1:1) for 400 min at 500 °C. (c) The used catalyst exposed to H<sub>2</sub>/CO<sub>2</sub>/N<sub>2</sub> (1:1:1) with 0.5% SO<sub>2</sub> for 400 min at 500 °C.

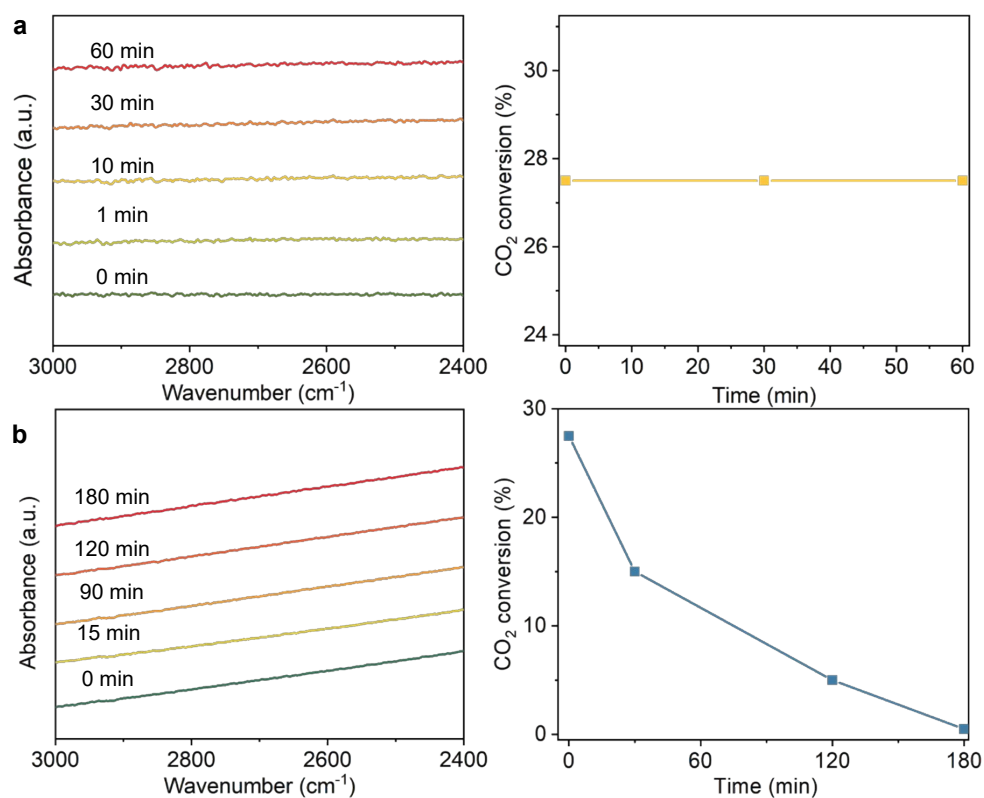

**Fig. S5. Evolution of the surface functional groups over Cu-ZnO-Al<sub>2</sub>O<sub>3</sub> with TOS.**

The catalyst was first exposed to (a) CO<sub>2</sub>/H<sub>2</sub>/N<sub>2</sub> (1:1:1) for 60 min, followed by (b) switching the gas flow to CO<sub>2</sub>/H<sub>2</sub>/N<sub>2</sub> (1:1:1) with 0.5% SO<sub>2</sub>. CO<sub>2</sub> conversion during the TOS of 180 min detected by gas analyzer. No CH<sub>4</sub> formation was detected. Reaction conditions: 500 °C, 1 bar, gas flow rate of 30 mL min<sup>-1</sup>.

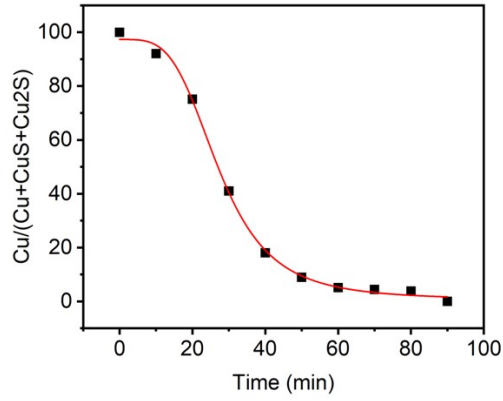

**Fig. S6 Experimental data and fit of metallic Cu phase disappearance kinetics**

The normalized phase fraction evolution of Cu (derived from XRD peak area) was fitted using a power-law logistic function:

$$X(t) = 0.64 + 96.68 / (1 + (\frac{t}{27.3})^{3.8})$$

where:

$X_0=0.64$  represents the residual Cu fraction at equilibrium (unreacted Cu or background signal),

$A=96.68$  is the maximum amplitude of the reaction (total convertible Cu),

$\tau=27.3$  min is the characteristic time for 50% conversion,

$n=3.8$  is the growth exponent reflecting the reaction mechanism.

Model validation demonstrates excellent agreement with experimental XRD trends ( $R^2=0.978$ ). The kinetic analysis of copper sulfidation reveals a diffusion-controlled nucleation-growth mechanism, characterized by a time constant  $\tau=27.3$  min, indicating that 50% of Cu converts to CuS/Cu<sub>2</sub>S within ~27 min. The growth exponent  $n=3.8$  aligns with 3D diffusion-limited Avrami-like kinetics (theoretical  $n=3-4$ ), supporting a three-stage mechanism.

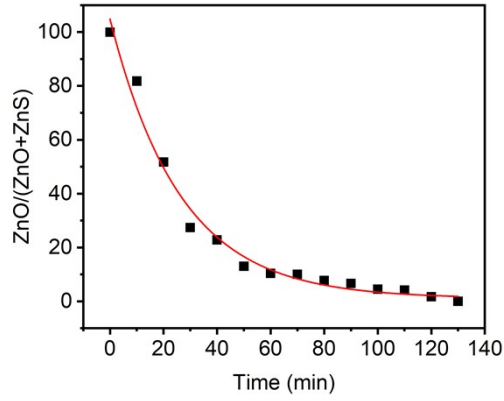

**Fig. S7 Experimental data and fit of ZnO phase disappearance kinetics**

The normalized residual ZnO fraction  $X(t)$ , derived from XRD peak area integration, was fitted using a single-exponential decay model with a baseline offset:

$$X(t) = 103.8e^{-\frac{t}{26.3}} + 1.08$$

where:

$A=103.8$  represents the initial ZnO content,

$\tau=26.3$  min is the characteristic time constant,

$B=1.08$  accounts for residual unreacted ZnO or instrumental background.

Model validation confirms the single-exponential decay model's superiority ( $R^2=0.983$ ). The sulfidation kinetics of ZnO follows a first-order process with a rate constant  $k=0.038 \text{ min}^{-1}$  and a half-life  $t_{1/2} \approx 18.2$  min, indicating rapid consumption of 50% ZnO within 18 min. A small residual fraction ( $\sim 1\%$ ,  $B=1.08$ ) persists due to kinetic limitations, likely from ZnS passivation layers blocking further sulfur diffusion. Mechanistically, the reaction proceeds via two distinct phases:



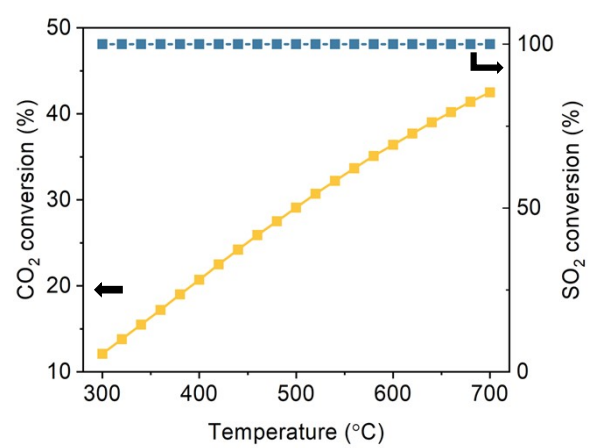

**Fig. S8. Thermodynamic equilibrium calculation.** (500°C, 0.5% SO<sub>2</sub>, H<sub>2</sub>/CO<sub>2</sub>=1:1), SO<sub>2</sub> is converted to H<sub>2</sub>S.

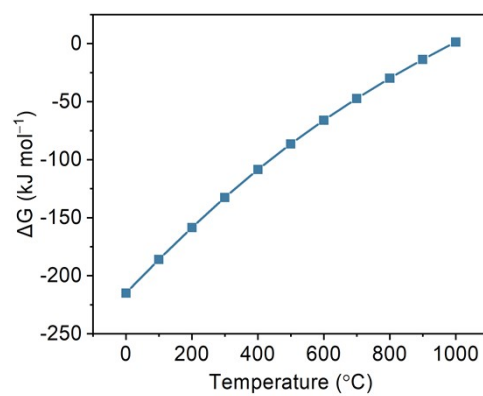

**Fig. S9. Gibbs free energies of the reaction:  $\text{SO}_2(\text{g}) + 3\text{H}_2(\text{g}) \rightarrow \text{H}_2\text{S}(\text{g}) + 2\text{H}_2\text{O}(\text{g})$ .**

**Table S1. XPS fitting parameters of Cu LMM for fresh and used catalysts.**

| Material                   | State           | Cu LMM B.E. (eV) | FWHM (eV) | <sup>a</sup> L/G Mix (%) | Amount (%) |
|----------------------------|-----------------|------------------|-----------|--------------------------|------------|
| Fresh catalyst             | Cu <sup>+</sup> | 570.3            |           | 30                       | 0          |
|                            | Cu <sup>0</sup> | 568.4            | 1.5       | 30                       | 100        |
| CuZnAl <sub>SO2-free</sub> | Cu <sup>+</sup> | 570.3            | 1.3       | 30                       | 18         |
|                            | Cu <sup>0</sup> | 568.4            | 1.4       | 30                       | 82         |
| CuZnAl <sub>0.5% SO2</sub> | Cu <sup>+</sup> | 570.3            | 1.8       | 30                       | 58         |
|                            | Cu <sup>0</sup> | 568.4            | 1.7       | 30                       | 42         |

<sup>a</sup> L/G: Lorentzian/Gaussian line shape.

**Table S2. XPS fitting parameters of Zn LMM for fresh and used catalysts.**

| Material                   | State            | Zn LMM (eV) | FWHM (eV) | <sup>a</sup> L/G Mix (%) | Amount (%) |
|----------------------------|------------------|-------------|-----------|--------------------------|------------|
| Fresh catalyst             | Zn <sup>6+</sup> | 496.0       | 3.5       | 30                       | 37         |
|                            | Zn <sup>2+</sup> | 499.5       | 3.5       | 30                       | 63         |
| CuZnAl <sub>SO2-free</sub> | Zn <sup>6+</sup> | 496.0       | 3.4       | 30                       | 37         |
|                            | Zn <sup>2+</sup> | 499.5       | 3.5       | 30                       | 63         |
| CuZnAl <sub>0.5% SO2</sub> | Zn <sup>6+</sup> | 496.0       | 3.5       | 30                       | 33         |
|                            | Zn <sup>2+</sup> | 499.5       | 3.5       | 30                       | 67         |

<sup>a</sup> L/G: Lorentzian/Gaussian line shape.

**Table S3.** ICP-OES results of the fresh and used Cu/ZnO/Al<sub>2</sub>O<sub>3</sub> catalysts.

|                            | Cu (mg g <sup>-1</sup> ) | Zn (mg g <sup>-1</sup> ) | Al (mg g <sup>-1</sup> ) | Cu loading (wt.%) | ZnO loading (wt.%) | Al <sub>2</sub> O <sub>3</sub> loading (wt.%) | S (mg g <sup>-1</sup> ) |
|----------------------------|--------------------------|--------------------------|--------------------------|-------------------|--------------------|-----------------------------------------------|-------------------------|
| Before reaction            | 461.9                    | 182.4                    | 49.1                     | 59.1              | 29.0               | 11.9                                          | -                       |
| CuZnAl <sub>SO2-free</sub> | 468.3                    | 175.2                    | 50.2                     | 59.8              | 28.2               | 11.9                                          | -                       |
| CuZnAl <sub>0.5% SO2</sub> | 471.2                    | 178.3                    | 49.5                     | -                 | -                  | -                                             | 335.3                   |

**Note S1:**

Theoretical sulfur content for complete conversion of Cu → Cu<sub>2</sub>S and ZnO → ZnS was calculated as follows:

## 1. Mass balance:

- 1) Initial Cu: 591 mg/g<sup>-1</sup> → Moles of Cu = 591 mg / 63.55 g mol<sup>-1</sup> = 9.30 mmol g<sup>-1</sup>
- 2) Initial ZnO: 290 mg g<sup>-1</sup> → Moles of Zn = (290 mg × 65.38/81.38) / 65.38 g mol<sup>-1</sup> = 3.56 mmol g<sup>-1</sup>

## 2. Sulfur stoichiometry:

- 1) Cu<sub>2</sub>S requires 4.65 mmol S g<sup>-1</sup> (9.30 mmol Cu × 1 mol S / 2 mol Cu).
- 2) ZnS requires 3.56 mmol S g<sup>-1</sup>.
- 3) Total S = 4.65 + 3.56 = 8.21 mmol S g<sup>-1</sup> → 263 mg S g<sup>-1</sup> (26.3 wt%).

If Cu was fully converted to CuS, theoretical sulfur content for complete conversion of Cu → CuS and ZnO → ZnS was calculated as follows:

## 3. Sulfur stoichiometry:

- 4) CuS requires 9.30 mmol S g<sup>-1</sup> (9.30 mmol Cu × 1 mol S / 1 mol Cu).
- 5) ZnS requires 3.56 mmol S g<sup>-1</sup>.
- 6) Total S = 9.30 + 3.56 = 12.86 mmol S g<sup>-1</sup> → 412.3 mg S g<sup>-1</sup> (41.2 wt%).
